# Supplementary material
Source: PubMed Central journal article supplement (PMC4043868)
Supplement: NIHMS534545-supplement-supplemental_methods.pdf [file NIHMS534545-supplement-supplemental_methods.pdf]

# Genome-wide association study of primary dentition pit-and-fissure and smooth surface caries

Zhen Zeng<sup>1,2</sup>, Eleanor Feingold<sup>1,2</sup>, Xiaojing Wang<sup>3</sup>, Daniel E. Weeks<sup>1,2</sup>, Myoungkeun Lee<sup>3</sup>, Karen T. Cuenco<sup>1,3</sup>, Barbara Broffitt<sup>4</sup>, Robert J. Weyant<sup>5</sup>, Richard Crout<sup>6</sup>, Daniel W. McNeil<sup>7,8</sup>, Steven M. Levy<sup>4,9</sup>, Mary L. Marazita<sup>1,3</sup>, John. R. Shaffer<sup>1</sup>

1) Department of Human Genetics, Graduate School of Public Health, University of Pittsburgh, Pittsburgh, PA, USA

2) Department of Biostatistics, Graduate School of Public Health, University of Pittsburgh, Pittsburgh, PA, USA

3) Center for Craniofacial & Dental Genetics, Department of Oral Biology, School of Dental Medicine, Pittsburgh, PA, USA

4) Department of Preventive and Community Dentistry, University of Iowa College of Dentistry, Iowa City, IA, USA

5) Department of Dental Public Health and Information Management, School of Dental Medicine, University of Pittsburgh, Pittsburgh, PA, USA

6) Department of Periodontics, School of Dentistry, West Virginia University, Morgantown, WV, USA

7) Department of Dental Practice and Rural Health, West Virginia University, Morgantown, WV, USA

8) Department of Psychology, West Virginia University, Morgantown, WV, USA

9) Department of Epidemiology, University of Iowa College of Public Health, Iowa City, IA, USA

## Supplemental Methods

Details on subject recruitment and data collection have been described previously [Shaffer et al., 2011].

PF surfaces included buccal and occlusal surfaces of mandibular molars and lingual and occlusal surfaces of maxillary molars. SM surfaces included all other tooth surfaces. Phenotype assessment has been previously described in detail [Wang et al., 2010; Warren et al., 2002]. Inter- and intra-examiner concordance was high [Warren et al., 2002; Wendell et al., 2010].

All the genotype data are publicly available from dbGap (<http://www.ncbi.nlm.nih.gov/gap>, study accession designation: phs000095.v2.p1 for COHRA and IFS1; phs000440.v1.p1 for IFS2). Details regarding genotyping quality control can be found online ([https://www.genvastudy.org/sites/www/content/files/datacleaning/data\\_cleaning\\_reports/Dental\\_Caries\\_Marazita\\_DCR\\_6-2-2010.pdf](https://www.genvastudy.org/sites/www/content/files/datacleaning/data_cleaning_reports/Dental_Caries_Marazita_DCR_6-2-2010.pdf) for COHRA and IFS1; [https://www.genevastudy.org/sites/www/content/files/datacleaning/data\\_cleaning\\_reports/marazitaG\\_qc\\_report.pdf](https://www.genevastudy.org/sites/www/content/files/datacleaning/data_cleaning_reports/marazitaG_qc_report.pdf) for IFS2). Imputation of un-genotyped autosomal SNPs and sporadic missing data of genotyped autosomal SNPs was performed for COHRA and IFS1 samples using BEAGLE software [Browning and Browning, 2009] and the HapMap Phase III reference panel. Details regarding imputation are available online ([https://www.genevastudy.org/sites/www/content/files/datacleaning/imputation/Dental\\_Caries\\_Imputation\\_Report.pdf](https://www.genevastudy.org/sites/www/content/files/datacleaning/imputation/Dental_Caries_Imputation_Report.pdf)). In general, genotyping quality and imputation accuracy was excellent.

For association analysis, we filtered out SNPs with minor allele frequency < 0.02, Hardy-Weinberg equilibrium p-value < 0.001, or genotype call rate < 0.1, and also filtered out individuals with genotype call rate < 0.1, in either COHRA or IFS. As a result, 531,025 genotyped SNPs were included for  $df_{SM}$  scan and 531,230 for  $df_{SPF}$  scan. Including imputed SNPs, the numbers were increased to 1,216,189 and 1,216,074, for smooth and pit-and-fissure scans, respectively.

Because the IFS1 and IFS2 samples were from the same cohort and genotyped using the same platform, they were merged together and meta-analyzed using the participant-level data. Then meta-analysis was used to combine the COHRA and IFS association results. Between-genotyping-center differences were checked by comparing allele frequencies among COHRA, IFS1 and IFS2. Overall, the concordance was excellent.

The threshold for suggestive significance was set at  $\alpha = 1.0E-5$ . All tests for genetic association were performed using PLINK [Purcell et al., 2007]. Manhattan plots, quantile-quantile plots and estimates of genomic inflation factor ( $\lambda$ ) were generated using the R statistical package (R Foundation for Statistical Computing, Vienna, AU). LocusZoom [Pruim et al., 2010] was used to plot association signals for loci of interest. Cluster plots of observed allelic intensities were examined visually to ensure high genotype-calling quality for the top hit within each reported region. SNPs meeting criteria for suggestive significance were re-analyzed for the COHRA sample using likelihood-based methods that condition on the family-structure of the sample as implemented in SOLAR [Almasy and Blangero, 1998].

## References

- Almasy L, Blangero J: Multipoint quantitative-trait linkage analysis in general pedigrees. *American journal of human genetics* 1998;62:1198-1211.
- Browning BL, Browning SR: A unified approach to genotype imputation and haplotype-phase inference for large data sets of trios and unrelated individuals. *American journal of human genetics* 2009;84:210-223.
- Pruim RJ, Welch RP, Sanna S, Teslovich TM, Chines PS, Gliedt TP, Boehnke M, Abecasis GR, Willer CJ: Locuszoom: Regional visualization of genome-wide association scan results. *Bioinformatics* 2010;26:2336-2337.
- Purcell S, Neale B, Todd-Brown K, Thomas L, Ferreira MA, Bender D, Maller J, Sklar P, de Bakker PI, Daly MJ, Sham PC: Plink: A tool set for whole-genome association and population-based linkage analyses. *Am J Hum Genet* 2007;81:559-575.
- Shaffer JR, Wang X, Feingold E, Lee M, Begum F, Weeks DE, Cuenco KT, Barmada MM, Wendell SK, Crosslin DR, Laurie CC, Doheny KF, Pugh EW, Zhang Q, Feenstra B, Geller F, Boyd HA, Zhang H, Melbye M, Murray JC, Weyant RJ, Crout R, McNeil DW, Levy SM, Slayton RL, Willing MC, Broffitt B, Vieira AR, Marazita ML: Genome-wide association scan for childhood caries implicates novel genes. *J Dent Res* 2011;90:1457-1462.
- Wang X, Shaffer JR, Weyant RJ, Cuenco KT, DeSensi RS, Crout R, McNeil DW, Marazita ML: Genes and their effects on dental caries may differ between primary and permanent dentitions. *Caries Res* 2010;44:277-284.
- Warren JJ, Levy SM, Kanellis MJ: Dental caries in the primary dentition: Assessing prevalence of cavitated and noncavitated lesions. *J Public Health Dent* 2002;62:109-114.
- Wendell S, Wang X, Brown M, Cooper ME, DeSensi RS, Weyant RJ, Crout R, McNeil DW, Marazita ML: Taste genes associated with dental caries. *J Dent Res* 2010;89:1198-1202.
